# Supplementary material
Source: PubMed Central journal article supplement (PMC2234208)
Supplement: pnas_0707727105_4.pdf [file pnas_0707727105_4.pdf]

**Table 1. Dominance durations for individual subjects and stimuli**

| Experiment 1 |             | AR   |      |      | BF   |      |      | DY   |      |      | GM   |      |      | IF   |      |       | MM   |      |      |
|--------------|-------------|------|------|------|------|------|------|------|------|------|------|------|------|------|------|-------|------|------|------|
|              |             | mean | med. | std.  | mean | med. | std. |
| Plaid        | Component   | 5.91 | 4.46 | 5.03 | 5.15 | 4.89 | 2.69 | 3.55 | 3.35 | 2.07 | 3.57 | 3.59 | 1.74 | 8.05 | 3.97 | 16.52 | 4.66 | 3.56 | 3.29 |
|              | Coherent    | 9.81 | 8.24 | 7.66 | 4.63 | 3.25 | 4.53 | 4.91 | 4.57 | 3.07 | 3.22 | 2.47 | 1.93 | 2.16 | 1.47 | 1.82  | 4.26 | 3.63 | 4.17 |
| Necker       | Front left  | 5.67 | 4.57 | 3.71 | 6.28 | 4.80 | 4.64 | 4.38 | 3.25 | 2.93 | 4.32 | 3.38 | 3.31 | 3.6  | 2.9  | 2.61  | 5.50 | 4.37 | 4.05 |
|              | Front right | 2.76 | 2.35 | 1.44 | 3.67 | 2.95 | 2.47 | 3.63 | 2.74 | 2.17 | 4.02 | 3.3  | 2.92 | 3.24 | 2.75 | 2.39  | 5.07 | 3.70 | 4.13 |
| SfM          | Left        | 8.23 | 7.20 | 4.80 | 8.79 | 3.93 | 17.7 | 7.47 | 6.43 | 4.15 | 6.65 | 4.43 | 4.73 | 118  | 118  | n/a   | 49.0 | 8.37 | 73.4 |
|              | Right       | 12.4 | 6.32 | 13.1 | 9.15 | 6.74 | 7.46 | 7.73 | 7.28 | 3.85 | 10.2 | 5.83 | 10.7 | 155  | 155  | n/a   | 24.4 | 24.4 | 11.8 |
| Audi-tory    | Coherent    | 9.65 | 10.3 | 6.40 | 5.46 | 4.44 | 2.97 | 4.12 | 3.23 | 3.32 | 6.06 | 5.86 | 4.32 | 7.19 | 5.48 | 4.27  | 39.6 | 39.6 | n/a  |
|              | Component.  | 10.3 | 7.20 | 9.04 | 4.55 | 3.90 | 3.13 | 5.56 | 5.04 | 3.30 | 6.67 | 5.96 | 3.99 | 6.82 | 7.00 | 3.05  | 61.7 | 61.7 | 21.3 |

| Experiment 2     |           | FK   |      |      | JH   |      |      | LR   |      |      | MC   |      |      | RV   |      |      | ST   |      |      |
|------------------|-----------|------|------|------|------|------|------|------|------|------|------|------|------|------|------|------|------|------|------|
|                  |           | mean | med. | std. |
| Plaid (free)     | Component | 5.14 | 4.11 | 3.52 | 4.11 | 2.49 | 3.62 | 5.33 | 3.91 | 4.08 | 4.33 | 3.77 | 3.74 | 5.35 | 4.19 | 3.72 | 4.14 | 3.17 | 2.48 |
|                  | Coherent  | 2.91 | 2.15 | 1.97 | 2.60 | 1.65 | 2.48 | 3.05 | 1.87 | 2.49 | 3.03 | 2.49 | 2.31 | 1.86 | 1.52 | 1.11 | 7.45 | 4.84 | 9.91 |
| Plaid (fixation) | Component | 11.1 | 8.62 | 8.68 | 18.7 | 15.0 | 17.8 | 4.2  | 2.84 | 3.5  | 3.07 | 1.47 | 7.98 | 5.18 | 4.72 | 3.5  | 6.49 | 5.11 | 4.49 |
|                  | Coherent  | 2.55 | 2.32 | 1.11 | 2.22 | 1.64 | 2.08 | 2.04 | 1.59 | 1.28 | 2.79 | 2.08 | 1.93 | 2.11 | 1.82 | 1.15 | 2.94 | 2.27 | 2.88 |
| SfM (free)       | Left      | 5.05 | 1.15 | 9.01 | n/a  | n/a  | n/a  | 8.49 | 5.38 | 5.99 | 7.70 | 3.07 | 14.9 | 7.39 | 6.22 | 5.23 | 16.9 | 14.1 | 14.3 |
|                  | Right     | 5.43 | 1.22 | 7.83 | 88.3 | 88.3 | n/a  | 9.5  | 9.46 | 4.11 | 8.94 | 3.37 | 9.88 | 8.01 | 6.31 | 5.83 | 80.7 | 3.82 | 135  |
| SfM (fixation)   | Left      | 1.95 | 1.08 | 1.81 | 4.33 | 3.56 | 3.03 | 7.89 | 7.24 | 3.90 | 3.38 | 2.51 | 2.62 | 6.34 | 5.72 | 4.03 | 28.4 | 26.4 | 13.6 |
|                  | Right     | 4.11 | 1.39 | 4.98 | 4.41 | 3.07 | 2.98 | 7.48 | 7.03 | 2.80 | 5.35 | 4.53 | 4.15 | 7.00 | 6.61 | 5.32 | 18.4 | 22.4 | 12.1 |

Dominance durations in seconds for the immediate report condition of experiment 1 (top) and for the rivalry conditions of experiment 2 (bottom); med=median, std=standard-deviation; n/a denotes if there are less than two complete dominance periods. Initial and final dominance period (from trial onset or till trial offset, respectively) are not included in statistics.
