# Supplementary material
Source: PubMed Central journal article supplement (PMC2234208)
Supplement: pnas_0707727105_6.pdf [file pnas_0707727105_6.pdf]

**Table 3. Fixation**

| Experiment 2       |              | FK   |      |      | JH   |      |      | LR   |      |      | MC   |      |      | RV   |      |      | ST   |      |      |
|--------------------|--------------|------|------|------|------|------|------|------|------|------|------|------|------|------|------|------|------|------|------|
|                    |              | mean | med. | std. |
| Plaid<br>(rivalry) | Fixation     | 0.65 | 0.62 | 0.75 | 0.83 | 0.80 | 0.34 | 1.02 | 0.62 | 3.81 | 1.28 | 1.28 | 0.86 | 0.41 | 0.34 | 0.65 | 1.37 | 1.28 | 0.82 |
|                    | Free<br>View | 2.10 | 1.75 | 1.69 | 1.77 | 1.63 | 0.84 | 2.05 | 1.60 | 4.95 | 2.02 | 1.83 | 1.37 | 0.71 | 0.66 | 0.62 | 2.01 | 1.97 | 1.08 |
| SfM<br>(rivalry)   | Fixation     | 0.55 | 0.38 | 1.22 | 1.11 | 1.06 | 0.37 | 0.84 | 0.56 | 3.25 | 1.25 | 0.80 | 4.07 | 0.41 | 0.33 | 0.91 | 0.67 | 0.63 | 0.53 |
|                    | Free<br>View | 1.01 | 0.85 | 1.15 | 1.12 | 0.92 | 0.70 | 1.15 | 0.89 | 2.54 | 2.09 | 2.08 | 1.61 | 0.64 | 0.58 | 0.72 | 1.30 | 1.24 | 0.84 |
| Plaid<br>(replay)  | Fixation     | 0.68 | 0.71 | 0.40 | 0.77 | 0.74 | 0.42 | 1.09 | 0.63 | 4.50 | 1.21 | 0.83 | 1.38 | 0.57 | 0.44 | 1.21 | 0.64 | 0.54 | 1.81 |
|                    | Free<br>View | 1.78 | 1.13 | 2.34 | 0.72 | 0.71 | 0.38 | 1.88 | 1.20 | 5.13 | 1.88 | 1.74 | 1.73 | 0.69 | 0.61 | 0.79 | 1.10 | 0.89 | 1.12 |
| SfM<br>(replay)    | Fixation     | 1.31 | 1.19 | 1.31 | 0.81 | 0.78 | 0.49 | 1.20 | 0.80 | 4.16 | 1.26 | 1.04 | 3.11 | 0.48 | 0.40 | 0.85 | 0.68 | 0.60 | 0.82 |
|                    | Free<br>View | 1.80 | 1.60 | 1.44 | 1.57 | 1.79 | 0.77 | 1.63 | 1.09 | 4.58 | 2.24 | 1.45 | 5.55 | 1.29 | 1.16 | 1.44 | 1.40 | 1.31 | 0.84 |

Mean and standard-deviation of eye position (distance from stimulus' center in degrees) in fixation and free-viewing conditions of experiment 2. As expected, the mean distance of the eye from the center ("mean eye position") was nearly always smaller for fixation conditions as compared to the corresponding free viewing condition (rivalry: 12/12 pairs of conditions; replay: 11/12). This is, observers followed the instruction to fixate and most of them moved their eyes comparably freely in free viewing. Importantly though, both the fixation and non-fixation conditions are consistent with the data of experiment 1 in having large inter- and intraobserver variability. When comparing fixation to free-viewing in individual subjects/conditions, 12 show higher median dominance durations for fixation, and 11 for free-viewing (Table 1). Hence, there is no consistent effect of fixation on switch durations that could bias the analysis.
