# Supplementary material
Source: PubMed Central journal article supplement (PMC2234208)

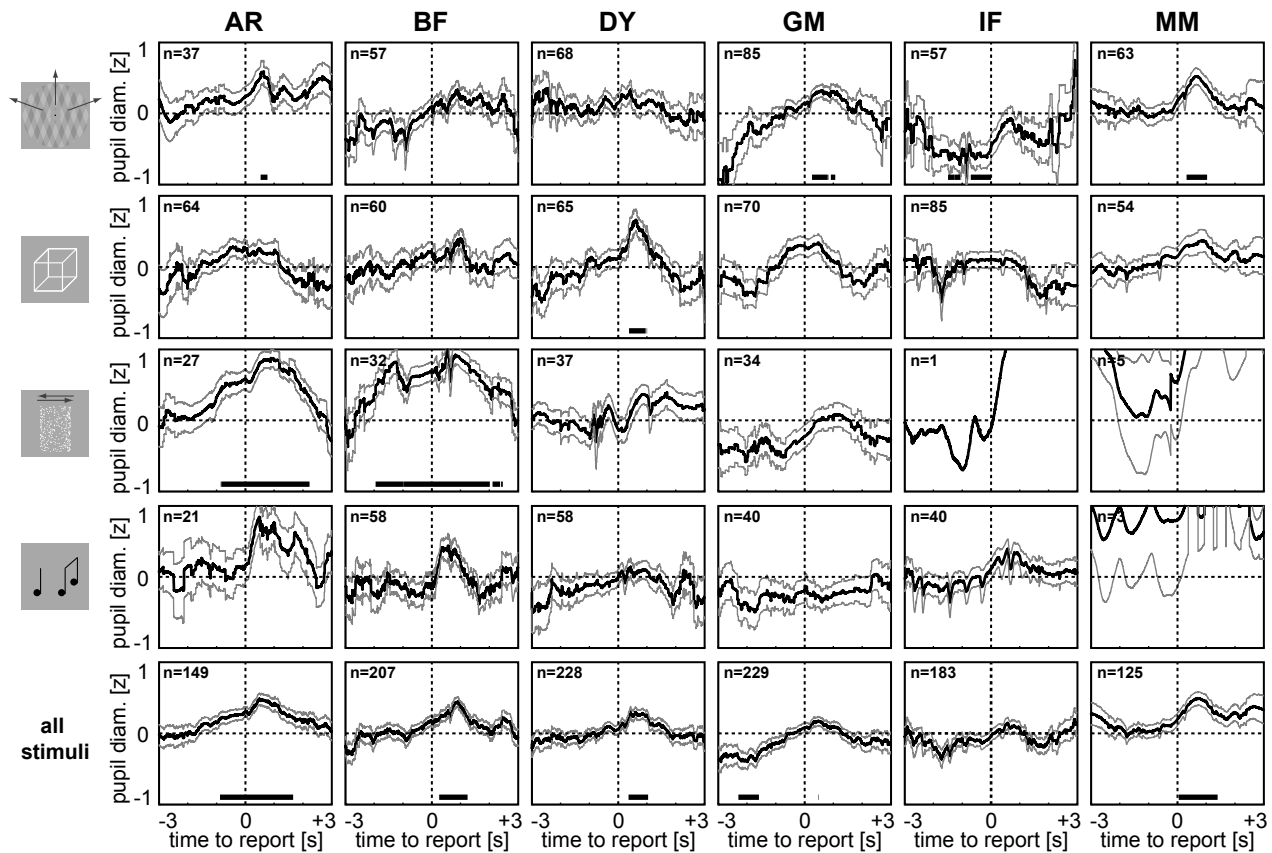

Supplement: pnas_0707727105_1.pdf [file pnas_0707727105_1.pdf]

# fixation and free-viewing

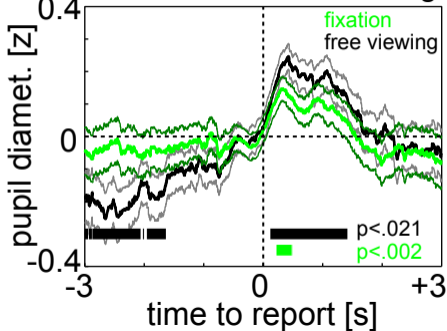

Supplement: pnas_0707727105_2.pdf [file pnas_0707727105_2.pdf]

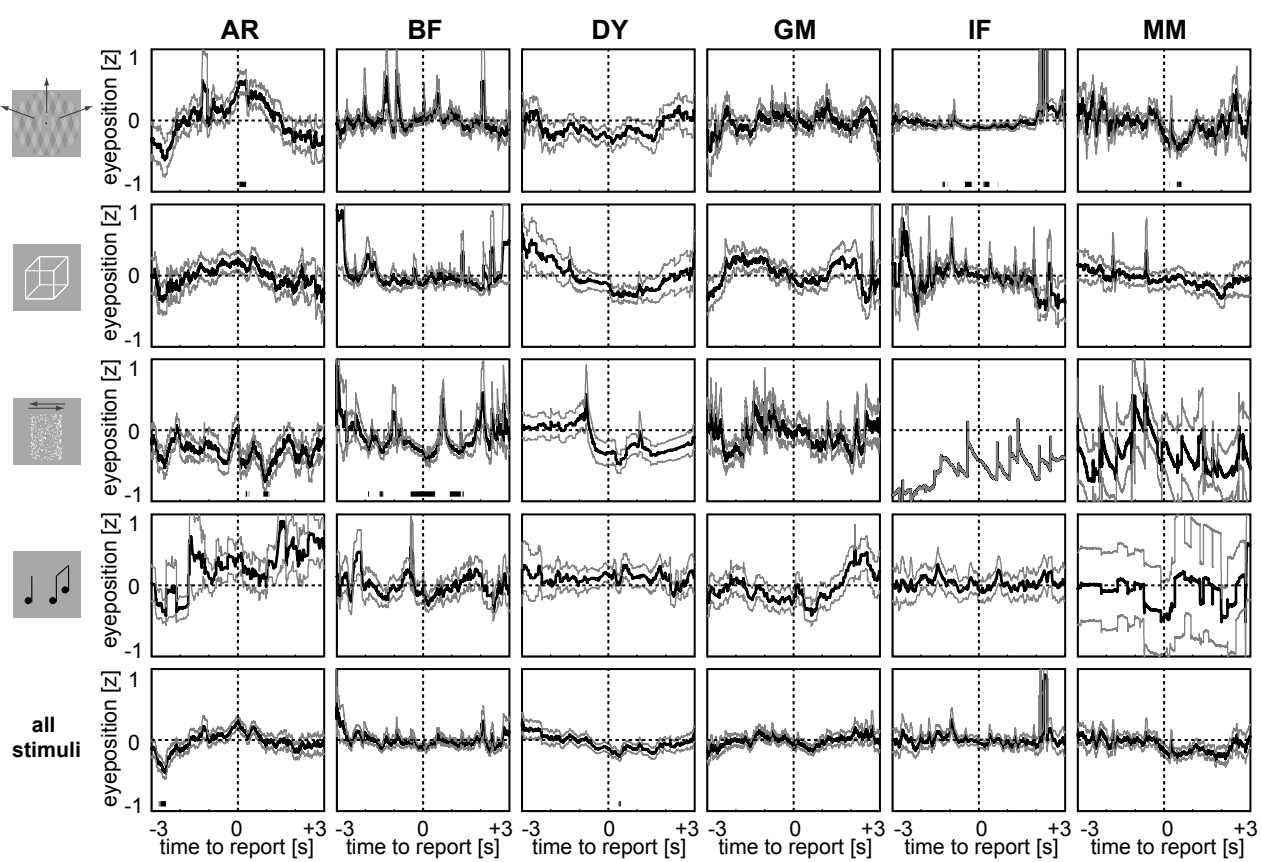

Supplement: pnas_0707727105_3.pdf [file pnas_0707727105_3.pdf]
